# Supplementary material
Source: MDPI journal article supplement (https://www.mdpi.com/2071-1050/12/11/4340)
Supplement: s1 [file s1]

| MENU PEIR 1   |                                                                                                                                                                                           |                                                                                                                                                                              |                                                                                                                                                                                  |                                                                                                                                                                                                                                   |                                                                                                                                                                                  |
|---------------|-------------------------------------------------------------------------------------------------------------------------------------------------------------------------------------------|------------------------------------------------------------------------------------------------------------------------------------------------------------------------------|----------------------------------------------------------------------------------------------------------------------------------------------------------------------------------|-----------------------------------------------------------------------------------------------------------------------------------------------------------------------------------------------------------------------------------|----------------------------------------------------------------------------------------------------------------------------------------------------------------------------------|
|               | MONDAY                                                                                                                                                                                    | TUESDAY                                                                                                                                                                      | WEDNESDAY                                                                                                                                                                        | THURSDAY                                                                                                                                                                                                                          | FRIDAY                                                                                                                                                                           |
| <b>WEEK 1</b> | Cauliflower, string beans, carrots and olives<br><br>Chicken fillet with sauce<br><br>Black bean<br><br>Integral rice with carrots<br><br>Crumbs with soy<br><br>Orange<br><br>Cajá juice | Cauliflower, cabbage leaf, cabbage and carrots<br><br>Cooked meat lures<br><br>Brown bean<br><br>White rice with peas<br><br>Cooked yam<br><br>Watermelon<br><br>Mango juice | Lettuce, tomato, onion, bell pepper and cucumber<br><br>Chicken pieces<br><br>Black bean<br><br>White rice<br><br>Cooked sweet potato<br><br>Sugar cane candy<br><br>Guava juice | Lettuce, carrots, beets, tomatoes and onions<br><br>Meat cooked with cassava<br><br>Brown bean<br><br>White rice with carrots<br><br>Banana candy<br><br>Acerola juice                                                            | Cucumber, tomato and bell pepper<br><br>Fish fillet with coconut milk<br><br>Black bean<br><br>White rice with green corn<br><br>Baked potato<br><br>Orange<br><br>Cashew juice  |
| <b>WEEK 2</b> | Cauliflower, tomato, cucumber and onion<br><br>Chicken stroganoff<br><br>Brown bean<br><br>White rice<br><br>Crumbs with beets<br><br>Watermelon<br><br>Mango juice                       | Cucumber, tomato, cauliflower and onion<br><br>Salted meat<br><br>Brown bean<br><br>White rice<br><br>Cooked Pumpkin<br><br>Banana<br><br>Grape juice                        | Lettuce, chard, beets and onions<br><br>Shredded chicken<br><br>Black bean<br><br>Integral rice with carrots<br><br>Crumbs<br><br>Banana candy<br><br>Acerola juice              | Cabbage, cabbage leaf and carrots<br><br>Cooked fish<br><br>Brown bean<br><br>White rice with green corn<br><br><i>Pirão</i> (typical Brazilian plate made with cassava flour)<br><br>Pineapple with cinnamon<br><br>Cashew juice | Lettuce, apple, cucumber, beet and carrot<br><br>Roast chicken<br><br>Black bean<br><br>Garlic and oil noodles<br><br>Cooked sweet potato<br><br>Milk candy<br><br>Acerola juice |
| <b>WEEK 3</b> | Lettuce, tomato, cabbage, onion and carrot<br><br>Ground beef<br><br>Brown bean                                                                                                           | Cucumber, tomato, bell pepper<br><br>Beef liver with onions<br><br>Black bean                                                                                                | Carrot, pumpkin, cauliflower, chayote and string beans<br><br>Beef steak<br><br>Brown bean<br><br>Spaghetti noodles                                                              | Lettuce, chard, cabbage, tomato, green corn and pineapple<br><br>Roast chicken                                                                                                                                                    | Lettuce, beets, cabbage and carrots<br><br>Shredded meat with onions                                                                                                             |

|                    |                                                                                                                                                                                                              |                                                                                                                                                                                                   |                                                                                                                                                          |                                                                                                                                                                                       |                                                                                                                                                                     |
|--------------------|--------------------------------------------------------------------------------------------------------------------------------------------------------------------------------------------------------------|---------------------------------------------------------------------------------------------------------------------------------------------------------------------------------------------------|----------------------------------------------------------------------------------------------------------------------------------------------------------|---------------------------------------------------------------------------------------------------------------------------------------------------------------------------------------|---------------------------------------------------------------------------------------------------------------------------------------------------------------------|
|                    | Integral rice with green corn<br>Cooked potato<br>Pineapple<br>Cajá juice                                                                                                                                    | White rice with green pod<br>Crumbs<br>Milk candy<br>Guava juice                                                                                                                                  | Crumbs with bananas<br>Watermelon<br>Acerola juice                                                                                                       | <i>Feijoada</i> (black beans with sausage)<br>White rice<br>Crumbs<br>Orange<br>Mango juice                                                                                           | White bean<br>Rice with milk<br>Cooked manioc<br>Pineapple with cinnamon<br>Cashew juice                                                                            |
| <b>WEEK 4</b>      | Cabbage, string beans, pineapple and tomato<br><br>Cooked meat with vegetables<br><br>Black bean<br>White rice<br><i>Pirão</i> (typical Brazilian plate made with cassava flour)<br><br>Orange<br>Cajá juice | Tomato, onion and bell pepper<br>Barbecue<br><i>Baião de dois</i> (typical dish of northeast Brazil made with green beans and white rice)<br><br>Crumbs with onions<br>Milk candy<br>Cashew juice | Chayote, carrot and potato<br><br>Diced chicken<br>Black bean<br><br>Integral rice with string beans<br><br>Crumbs with soy<br>Watermelon<br>Mango juice | Lettuce, tomato, onion, bell pepper and cabbage leaf<br><br>Fish fillet with tomato sauce<br><br>Brown bean<br>White rice with carrots<br><br>Potato gratin<br>Melon<br>Mangaba juice | Lettuce, tomato, cabbage, onion and carrot<br><br>Chicken in pineapple sauce<br><br>White bean<br>White rice<br><br>Mashed pumpkin<br>Banana candy<br>Acerola juice |
| <b>MENU PEIR 2</b> |                                                                                                                                                                                                              |                                                                                                                                                                                                   |                                                                                                                                                          |                                                                                                                                                                                       |                                                                                                                                                                     |
|                    | <b>MONDAY</b>                                                                                                                                                                                                | <b>TUESDAY</b>                                                                                                                                                                                    | <b>WEDNESDAY</b>                                                                                                                                         | <b>THURSDAY</b>                                                                                                                                                                       | <b>FRIDAY</b>                                                                                                                                                       |
| <b>WEEK 1</b>      | Tomato, cucumber, cabbage<br><br>Chicken steak<br><br>White rice with green corn<br><br>Brown bean<br>Cooked sweet potato<br>Pineapple juice                                                                 | Lettuce, cucumber and carrot<br><br>Meatballs<br><br>White rice with cabbage leaf<br><br>Black bean<br>Crumbs with onions<br>Cajá juice                                                           | Lettuce, tomato and beet<br><br>Chicken Cream<br><br>Salted meat with cassava flour<br>White rice<br>Brown bean<br>Cooked sweet potato<br>Cashew juice   | Tomato, onion and bell pepper<br><br>Steak with sauce<br><br>White rice with string beans<br>White bean<br>Crumbs<br>Guava juice                                                      | Lettuce, carrots and beets<br><br>Fried fish<br>White rice<br>Brown bean<br>Couscous<br>Acerola juice                                                               |

|                    |                            |                                |                                |                               |                                   |
|--------------------|----------------------------|--------------------------------|--------------------------------|-------------------------------|-----------------------------------|
| <b>WEEK 2</b>      | Tomato, carrot and cabbage | Tomato, onion and bell pepper  | Lettuce, tomato and beet       | Potatoes, carrots and chayote | Lettuce, tomato and mango         |
|                    | Chicken steak with onions  | Salted meat with cassava flour | Beef stroganoff                | Beef steak with onions        | Roasted chicken                   |
|                    | White rice with green corn | Milk rice                      | White rice                     | White rice with string beans  | White rice with peas              |
|                    | Brown bean                 | White bean                     | Brown bean                     | Black bean                    | Brown bean                        |
|                    | Crumbs with onions         | Cooked sweet potato            | Crumbs                         | Couscous                      | Pumpkin puree                     |
|                    | Cajá juice                 | Cashew juice                   | Guava juice                    | Cashew juice                  | Acerola juice                     |
| <b>WEEK 3</b>      | Lettuce, tomato and carrot | Tomato, onion and bell pepper  | Carrots, beets and tomatoes    | Lettuce, carrot and cucumber  | Lettuce, carrots and beets        |
|                    | Chicken salad              | Roasted chicken drumstick      | Chicken stroganoff             | Meat pancake                  | Fried fish                        |
|                    | White rice                 | White rice with carrots        | White rice                     | White rice with green corn    | White rice                        |
|                    | Brown bean                 | White bean                     | Brown bean                     | Black bean                    | Brown bean                        |
|                    | Crumb                      | Sweet potato                   | Crumbs with onions             | Cooked pumpkin                | Couscous                          |
|                    | Mango juice                | Cashew juice                   | Guava juice                    | Pineapple juice               | Acerola juice                     |
| <b>WEEK 4</b>      | Carrot, tomato, lettuce    | Cucumber, tomato and beet      | Cabbage, carrots and pineapple | Lettuce, tomato and beet      | Lettuce, tomato and cucumber      |
|                    | Chicken bait               | Meat with onions               | Breaded chicken                | Meatballs                     | Chicken with potatoes and carrots |
|                    | White rice                 | White rice with cabbage leaf   | Beef stew                      | Garlic and oil noodles        | White rice                        |
|                    | Black bean                 | Brown bean                     | Black bean                     | Brown bean                    | Brown bean                        |
|                    | Cooked sweet potato        | Cooked sweet potato            | Crumbs                         | Cooked pumpkin                | Cooked sweet potato               |
|                    | Cashew juice               | Cashew juice                   | Guava juice                    | Pineapple juice               | Cashew juice                      |
| <b>MENU PEIR 3</b> |                            |                                |                                |                               |                                   |
|                    | <b>MONDAY</b>              | <b>TUESDAY</b>                 | <b>WEDNESDAY</b>               | <b>THURSDAY</b>               | <b>FRIDAY</b>                     |

|               |                                                                                                                                                                                                                     |                                                                                                                                                                                                                                  |                                                                                                                                                                                                                        |                                                                                                                                                                                                                                           |                                                                                                                                                                                                                                           |
|---------------|---------------------------------------------------------------------------------------------------------------------------------------------------------------------------------------------------------------------|----------------------------------------------------------------------------------------------------------------------------------------------------------------------------------------------------------------------------------|------------------------------------------------------------------------------------------------------------------------------------------------------------------------------------------------------------------------|-------------------------------------------------------------------------------------------------------------------------------------------------------------------------------------------------------------------------------------------|-------------------------------------------------------------------------------------------------------------------------------------------------------------------------------------------------------------------------------------------|
| <b>WEEK 1</b> | Lettuce, tomato, bell pepper and onion<br><br>Chicken stroganoff<br><br>White rice with cabbage<br><br>Pasta with carrot<br><br>Beans<br><br>Crumbs with straw potato<br><br>Orange<br><br>Cashew juice             | Carrots, potatoes, chayote and lettuce<br><br>Meat in dark sauce<br><br>White rice with saffron<br><br>Macaroni with ham<br><br>Black bean<br><br>Crumbs with meat<br><br>Pineapple<br><br>Acerola juice                         | Onions, bell peppers, eggplants and tomatoes<br><br>Chicken with green corn sauce<br><br>White rice with vegetables<br><br>Pasta with sauce<br><br>Brown bean<br><br>Crumbs with onions<br><br>Melon<br><br>Cajá juice | Manioc, sweet potato and Pumpkin<br><br>Meat stew<br><br>White rice with parsley<br><br>Macaroni with green corn<br><br>White bean<br><br><i>Pirão</i> (typical Brazilian plate made with cassava flour)<br><br>Banana<br><br>Guava juice | Lettuce, carrot, beet and pineapple<br><br>Fish with rosé sauce<br><br>Ground beef<br><br>White rice with lentils<br><br>Black bean<br><br>Pasta with cheese<br><br>Toasted crumbs<br><br>Milk candy<br><br>Acerola juice                 |
| <b>WEEK 2</b> | Potatoes, carrots, chayote and cabbage<br><br>Steak with cheese and tomatoes<br><br>Black bean<br><br>White rice with green corn<br><br>Pasta with sauce<br><br>Crumbs with onions<br><br>Guava juice<br><br>Orange | String beans, onions, tomatoes, cabbage leaf, cabbage and beets<br><br>Roast chicken<br><br>White rice with cabbage leaf<br><br>Pasta with sauce<br><br>Brown bean<br><br>Crumbs with linseed<br><br>Cajá juice<br><br>Pineapple | Potatoes, carrots, chayote<br><br>Beef stewed with manioc<br><br>White bean with flour<br><br>White rice with vegetables<br><br>Pasta with sauce<br><br>Toasted crumbs<br><br>Cashew juice<br><br>Watermelon           | Lettuce, carrots, bell peppers, tomatoes and pineapple<br><br>Chicken fillet in white sauce<br><br>Black bean<br><br>White rice<br><br>Macaroni with ham<br><br>Crumbs with carrots<br><br>Acerola juice<br><br>Banana                    | Cabbage leaf, tomato, onion, bell pepper and green corn<br><br>Fish in tomato sauce<br><br>Meatballs**<br><br>Brown bean<br><br>White rice with vegetables<br><br>Macaroni<br><br>Crumbs with peanuts<br><br>Cajá juice<br><br>Milk candy |
| <b>WEEK 3</b> | Potato, carrot and chives<br><br>Pork loin in mustard sauce<br><br>Brown bean<br><br>White rice with parsley                                                                                                        | Sweet potato and manioc<br><br>Chinese chicken<br><br>Black bean                                                                                                                                                                 | Tomato, onion and carrot<br><br>Sliced Meat<br><br>White bean<br><br>Whole rice<br><br>Milk rice<br><br>Pasta with carrot                                                                                              | Cabbage leaf, potato, carrot and sweet potato<br><br>Chicken in carrot sauce<br><br>Black bean                                                                                                                                            | Lettuce, tomato, pepper and onion<br><br>Meat lures with olives<br><br>Brown bean                                                                                                                                                         |

|                    |                                                                                                                                                                                                                                           |                                                                                                                                                                                     |                                                                                                                                                                                             |                                                                                                                                                                                     |                                                                                                                                                                     |
|--------------------|-------------------------------------------------------------------------------------------------------------------------------------------------------------------------------------------------------------------------------------------|-------------------------------------------------------------------------------------------------------------------------------------------------------------------------------------|---------------------------------------------------------------------------------------------------------------------------------------------------------------------------------------------|-------------------------------------------------------------------------------------------------------------------------------------------------------------------------------------|---------------------------------------------------------------------------------------------------------------------------------------------------------------------|
|                    | Pasta with green corn and peas<br>Crumbs with carrots<br>Orange<br>Guava juice                                                                                                                                                            | White rice with shop suey<br>Pasta with sauce<br>Crumbs with strew potato<br>Watermelon<br>Cajá juice                                                                               | Crumbs with onions<br>Pineapple<br>Cashew juice                                                                                                                                             | White rice with bell pepper<br>Macaroni with ham<br>Crumbs with peanuts<br>Banana<br>Cashew juice                                                                                   | Rice with vegetables<br>Pasta with cheese<br>Toasted crumbs<br>Milk candy<br>Guava juice                                                                            |
| <b>WEEK 4</b>      | Tomato, cabbage, peppers and carrots<br><i>Paçoca</i> (Salted meat with cassava flour)<br>Shredded meat with cassava flour<br>White bean<br>White rice with saffron<br>Pasta with sauce<br>Crumbs with olives<br>Watermelon<br>Cajá juice | Carrot, pineapple, tomato, plum and onion<br>Pork loin in tomato sauce<br>Brown bean<br>Rice with vegetables<br>Pasta with sauce<br>Crumbs with meat<br>Guava candy<br>Cashew juice | Lettuce, tomato, cabbage, onion and apple<br>Chicken in white sauce<br>Black bean<br>White rice with cilantro<br>Pasta with tomato sauce<br>Crumbs with onions<br>Pineapple<br>Cashew juice | Chard, tomato, carrot and onion<br>Pork loin in tomato sauce<br>Black bean<br>Rice with vegetables<br>Macaroni in tomato sauce<br>Crumbs with meat<br>Banana<br>Passion fruit juice | Lettuce, tomato, bell pepper and onion<br>Pan steak<br>Brown bean<br>White rice with green corn<br>Pasta with sauce<br>Crumbs with onions<br>Orange<br>Cashew juice |
| <b>MENU PEIR 4</b> |                                                                                                                                                                                                                                           |                                                                                                                                                                                     |                                                                                                                                                                                             |                                                                                                                                                                                     |                                                                                                                                                                     |
|                    | <b>MONDAY</b>                                                                                                                                                                                                                             | <b>TUESDAY</b>                                                                                                                                                                      | <b>WEDNESDAY</b>                                                                                                                                                                            | <b>THURSDAY</b>                                                                                                                                                                     | <b>FRIDAY</b>                                                                                                                                                       |
| <b>WEEK 1</b>      | Sautéed carrot and potato<br>Steak in barbecue sauce<br>White rice<br>Black bean                                                                                                                                                          | Pineapple, beet, carrot and tomato<br>Chinese chicken<br>White rice with vegetables                                                                                                 | Vinaigrette Salad<br>Salted meat with onions<br>White rice with carrots<br>Black bean<br>Crumbs with garlic<br>Cashew juice<br>Guava candy                                                  | Manioc with rustic sauce<br>Roast chicken<br>White rice with parsley<br>Black bean<br>Crumbs with onions                                                                            | Lettuce, chard, carrot, tomato and apple<br><i>Feijoada</i> (black beans with sausage)<br>White rice<br>Crumbs                                                      |

|               |                                                                                                                                                              |                                                                                                                                                                                 |                                                                                                                                                                                          |                                                                                                                                                                |                                                                                                                                                                                                            |
|---------------|--------------------------------------------------------------------------------------------------------------------------------------------------------------|---------------------------------------------------------------------------------------------------------------------------------------------------------------------------------|------------------------------------------------------------------------------------------------------------------------------------------------------------------------------------------|----------------------------------------------------------------------------------------------------------------------------------------------------------------|------------------------------------------------------------------------------------------------------------------------------------------------------------------------------------------------------------|
|               | Crumbs with nutmeg<br><br>Grape juice<br><br>Guava candy                                                                                                     | Crumbs with nutmeg<br><br>Acerola juice<br><br>Guava candy                                                                                                                      |                                                                                                                                                                                          | Acerola juice<br><br>Guava candy                                                                                                                               | Mango juice<br><br>Guava candy                                                                                                                                                                             |
| <b>WEEK 2</b> | Potato, carrot and chayote sautéed<br><br>Steak in California sauce<br><br>White rice<br><br>Black bean<br><br>Crumbs<br><br>Cashew juice<br><br>Guava candy | Chard, lettuce, carrot, apple, onion and bell pepper<br><br>Roast chicken<br><br>White rice<br><br>Black bean<br><br>Crumbs with garlic<br><br>Acerola juice<br><br>Guava candy | Manioc with butter<br><br>Salted meat<br><br>Cooked meat with onions<br><br>White rice with carrots<br><br>Black bean<br><br>Crumbs with garlic<br><br>Cajá juice<br><br>Pineapple candy | Cabbage, bell peppers, onions and string beans<br><br>Roast chicken<br><br>White rice<br><br>Black bean<br><br>Crumbs<br><br>Acerola juice<br><br>Banana candy | Beets, carrots, onions, cabbage and mint<br><br>Cooked meat<br><br>Black bean<br><br>White rice<br><br><i>Pirão</i> (typical Brazilian dish made with cassava flour)<br><br>Mango juice<br><br>Guava candy |
| <b>WEEK 3</b> | Beets, carrots and string beans<br><br>Mixed barbecue<br><br>White rice<br><br>Black bean<br><br>Crumbs<br><br>Acerola juice<br><br>Guava candy              | Chard, apple, bell pepper and carrot<br><br>Roast chicken<br><br>White rice<br><br>Black bean<br><br>Crumbs<br><br>Cajá juice<br><br>Guava candy                                | Manioc with butter<br><br>Salted meat<br><br>Cooked meat with onions<br><br>White rice<br><br>Black bean<br><br>Crumbs with garlic<br><br>Mango juice<br><br>Guava candy                 | Cabbage, beets and carrots<br><br>Chicken with eggplant sauce<br><br>White rice<br><br>Black bean<br><br>Crumbs<br><br>Acerola juice<br><br>Orange             | Lettuce, tomato and carrot<br><br>Chicken with Chinese sauce<br><br>White rice with beans<br><br>Black bean<br><br>Crumbs<br><br>Acerola juice<br><br>Guava candy                                          |
| <b>WEEK 4</b> | Manioc with butter<br><br>Salted meat<br><br>Black bean                                                                                                      | Beet, potato, apple and green corn<br><br>Steak with Sicilian sauce<br><br>Black bean                                                                                           | Chard, carrot, cabbage, bell peppers, Italian sauce<br><br>Roast chicken on barbecue sauce<br><br>Brown bean<br><br>White rice                                                           | Carrot, cabbage and pineapple<br><br>Chinese chicken<br><br>Black bean                                                                                         | Cabbage, carrot, beet, bell pepper<br><br><i>Feijoada</i> (black beans with sausage)<br><br>White rice                                                                                                     |

|                    |                                                                                                                       |                                                                                                                                        |                                                                                                                        |                                                                                                             |                                                                                                                                       |
|--------------------|-----------------------------------------------------------------------------------------------------------------------|----------------------------------------------------------------------------------------------------------------------------------------|------------------------------------------------------------------------------------------------------------------------|-------------------------------------------------------------------------------------------------------------|---------------------------------------------------------------------------------------------------------------------------------------|
|                    | White rice<br>Crumbs with garlic<br>Acerola juice<br>Guava candy                                                      | White rice<br>Crumbs with garlic<br>Grape juice<br>Guava candy                                                                         | Crumbs with onions<br>Grape juice<br>Guava candy                                                                       | White rice with vegetables<br>Crumbs with garlic<br>Acerola juice<br>Guava candy                            | Crumbs<br>Acerola juice<br>Melon                                                                                                      |
| <b>MENU PEIR 5</b> |                                                                                                                       |                                                                                                                                        |                                                                                                                        |                                                                                                             |                                                                                                                                       |
|                    | <b>MONDAY</b>                                                                                                         | <b>TUESDAY</b>                                                                                                                         | <b>WEDNESDAY</b>                                                                                                       | <b>THURSDAY</b>                                                                                             | <b>FRIDAY</b>                                                                                                                         |
| <b>WEEK 1</b>      | Chard, beet, cucumber, cabbage and tomato<br>Steak with onions<br>White rice<br>Brown bean<br>Crumbs<br>Acerola juice | Potatoes and carrots<br>Chicken stroganoff<br>White rice<br>Green bean<br>Couscous<br>Cajá juice                                       | Chard, carrot, lettuce and tomato<br>Meat lures<br>White rice with cabbage leaf<br>Brown bean<br>Crumbs<br>Grape juice | Potatoes, chives, pumpkin and zucchini<br>Ground beef<br>Macaroni<br>Black bean<br>Couscous<br>Cashew juice | Chard, carrot, cucumber, cabbage and tomato<br>Roasted chicken fillet<br>Integral rice<br>Brown bean<br>Sweet potato<br>Guava juice   |
| <b>WEEK 2</b>      | Chard, lettuce, carrot, arugula and tomato<br>Stew meat<br>White rice<br>Black bean<br>Crumbs<br>Acerola juice        | Chives, carrots, cabbage and tomatoes<br>Diced chicken in white sauce<br>Integral rice<br>Brown bean<br>Couscous crumbs<br>Guava juice | Pineapple, carrot, raisin and cabbage<br>Pan steak<br>White rice<br>Black bean<br>Crumbs<br>Cashew juice               | Potato<br>Roasted chicken<br>White rice<br>Green bean<br>Crumbs<br>Cajá juice                               | Chard, lettuce and tomato<br><i>Paçoca</i> (Salted meat with cassava flour)<br>Rice with milk<br>Brown bean<br>Crumbs<br>Cashew juice |
| <b>WEEK 3</b>      | Chard, lettuce, beets, cucumbers and tomatoes<br>Crispy chicken<br>White rice<br>Black bean<br>Crumbs with beets      | Potatoes, chives, carrots, chayote<br>Meat baits with onions<br>White rice<br>Black bean with cassava flour                            | Chard, lettuce, cabbage and tomato<br>Chinese chicken<br>Integral rice<br>Brown bean<br>Crumbs<br>Acerola juice        | Chard, lettuce, carrot, arugula and tomato<br>Ground beef<br>Macaroni<br>Black bean<br>Crumbs<br>Cajá juice | Lettuce, tomato, pepper and onion<br>Steak with onions<br>White rice with carrots<br>Brown bean<br>Crumbs                             |

|                    |                                                                                                                           |                                                                                                                      |                                                                                                                         |                                                                                                                       |                                                                                                                         |
|--------------------|---------------------------------------------------------------------------------------------------------------------------|----------------------------------------------------------------------------------------------------------------------|-------------------------------------------------------------------------------------------------------------------------|-----------------------------------------------------------------------------------------------------------------------|-------------------------------------------------------------------------------------------------------------------------|
|                    | Guava juice                                                                                                               | Sweet potato puree<br>Cajá juice                                                                                     |                                                                                                                         |                                                                                                                       | Guava juice                                                                                                             |
| <b>WEEK 4</b>      | Chard, beet, cucumber, cabbage and tomato<br>Roasted chicken fillet<br>White rice<br>Black bean<br>Crumbs<br>Cashew juice | Potatoes, chives, carrots and cabbage<br>Beef loin<br>White rice<br>Brown bean<br>Couscous<br>Acerola juice          | Pineapple, carrot, raisin and cabbage<br>Roasted chicken drumstick<br>Macaroni<br>Black bean<br>Crumbs<br>Guava juice   | Potato and carrot<br>Fish stew<br>Integral rice<br>Green bean<br>Cooked sweet potato<br>Cajá juice                    | Chard, carrot, lettuce and tomato<br>Meat pancake<br>White rice<br>Brown bean<br>Crumbs with beets<br>Cajá juice        |
| <b>MENU PEIR 6</b> |                                                                                                                           |                                                                                                                      |                                                                                                                         |                                                                                                                       |                                                                                                                         |
|                    | <b>MONDAY</b>                                                                                                             | <b>TUESDAY</b>                                                                                                       | <b>WEDNESDAY</b>                                                                                                        | <b>THURSDAY</b>                                                                                                       | <b>FRIDAY</b>                                                                                                           |
| <b>WEEK 1</b>      | Lettuce, cabbage and carrots<br>Chicken fillet with onions<br>White rice<br>Brown bean<br>Crumbs<br>Guava juice           | Vinaigrette<br><i>Paçoca</i> (Salted meat with cassava flour)<br>Milk rice<br>Black bean<br>Couscous<br>Cashew juice | Chayote and carrot<br>Meat stroganoff White rice with carrots<br>White bean with flour<br>Banana                        | Green salad<br>Fried chicken<br>Garlic and oil noodles<br>Black bean<br>Couscous<br>Passion fruit juice               | Carrot, chayote and potato<br>Chicken pancake<br>White rice<br>Brown bean<br>Crumbs<br>Papaya                           |
| <b>WEEK 2</b>      | Lettuce, cabbage and carrots<br>Chinese chicken<br>White rice<br>Black bean<br>Couscous<br>Pineapple                      | Braised cabbage<br>Chicken in sauce<br>White rice with saffron<br>Brown bean<br>Crumbs<br>Mango juice                | Chayote, carrot and potato<br>Ground beef with vegetables<br>Garlic and oil noodles<br>Black bean<br>Couscous<br>Banana | Lettuce, cabbage and cucumber<br>Chicken stroganoff<br>White rice with carrots<br>Brown bean<br>Crumbs<br>Guava juice | Mashed potatoes and sweet potato<br>Breaded chicken bait<br>White rice<br>Black bean<br>Couscous<br>Passion fruit juice |

|                   |                              |                              |                                                |                             |                                                |
|-------------------|------------------------------|------------------------------|------------------------------------------------|-----------------------------|------------------------------------------------|
| <b>WEEK<br/>3</b> | Chayote and carrot           | Lettuce, cabbage and carrots | Lettuce, cabbage and cucumber                  | Vinaigrette                 | Pumpkin                                        |
|                   | Meat stroganoff              | Fried chicken                | <i>Paçoca</i> (Salted meat with cassava flour) | Chicken in green corn cream | Meat pancake                                   |
|                   | White rice                   | White rice with saffron      | White rice with bell pepper                    | White rice with carrots     | White rice                                     |
|                   | Black bean                   | Brown bean                   | Black bean                                     | Brown bean                  | Black bean                                     |
|                   | Crumbs                       | Couscous                     | Crumbs                                         | Couscous                    | Crumbs                                         |
|                   | Papaya                       | Cashew juice                 | Pineapple                                      | Cashew juice                | Passion fruit juice                            |
| <b>WEEK<br/>4</b> | Lettuce, cabbage and carrots | Braised cabbage              | Carrot, chayote and potato                     | Lettuce, cabbage and carrot | Pumpkin                                        |
|                   | Ground beef                  | Chinese chicken              | Chicken                                        | Chinese chicken             | <i>Paçoca</i> (Salted meat with cassava flour) |
|                   | Macaroni                     | White rice with saffron      | White rice                                     | White rice with carrots     | White rice with carrots                        |
|                   | Brown bean                   | Black bean                   | Brown bean                                     | Black bean                  | Brown bean                                     |
|                   | Couscous                     | Crumbs                       | Couscous                                       | Crumbs                      | Couscous                                       |
|                   | Banana                       | Mango juice                  | Papaya                                         | Guava juice                 | Cashew juice                                   |
